# Supplementary material for: APEX1 is a novel diagnostic and prognostic biomarker for hepatocellular carcinoma
Source: Aging (Albany NY). 2020 Mar 13;12(5):4573–91. doi: 10.18632/aging.102913 (PMC7093175; doi:10.18632/aging.102913)
Supplement: Supplementary Table 1 [file aging-12-102913-s001..xlsx]

## Sheet: Sheet1
Supplementary Table 1. The most significant survival-related genes in HCC.
Gene Symbol	Gene ID	P-Value (Survival OS)
HILPDA	ENSG00000135245.9	7.6e-09
CCDC58	ENSG00000160124.9	5.58e-08
B3GAT3	ENSG00000149541.9	2.3e-07
CLEC3B	ENSG00000163815.5	2.43e-07
CTB-147N14.6	ENSG00000275719.1	2.55e-07
SOCS2	ENSG00000120833.13	9.17e-07
LPCAT1	ENSG00000153395.9	1.25e-06
PES1	ENSG00000100029.17	1.79e-06
DNASE1L3	ENSG00000163687.13	1.87e-06
AHSA1	ENSG00000100591.7	1.92e-06
RP11-286H15.1	ENSG00000272789.1	2.25e-06
SAC3D1	ENSG00000168061.13	2.34e-06
SEC61G	ENSG00000132432.13	2.93e-06
RP11-295D4.1	ENSG00000262712.1	2.97e-06
RHPN1-AS1	ENSG00000254389.3	3.65e-06
MTCH1	ENSG00000137409.18	3.69e-06
PTTG1	ENSG00000164611.12	3.79e-06
SAMD13	ENSG00000203943.8	3.88e-06
CDC20	ENSG00000117399.13	4e-06
RPUSD3	ENSG00000156990.14	4.24e-06
SLC41A3	ENSG00000114544.15	4.36e-06
STEAP1B	ENSG00000105889.14	5.18e-06
CCDC137	ENSG00000185298.12	5.63e-06
MED19	ENSG00000156603.14	6.11e-06
SNRPEP2	ENSG00000256968.1	6.86e-06
LINC01134	ENSG00000236423.5	6.98e-06
NRAV	ENSG00000248008.2	7.04e-06
TMEM185B	ENSG00000226479.3	7.08e-06
HM13	ENSG00000101294.16	7.14e-06
NAP1L1P1	ENSG00000254759.1	7.58e-06
CELSR3	ENSG00000008300.14	7.68e-06
GNL2	ENSG00000134697.12	8.47e-06
EIF2S2	ENSG00000125977.6	9.41e-06
GPSM2	ENSG00000121957.12	9.64e-06
TIMM23	ENSG00000265354.3	9.85e-06
PPM1G	ENSG00000115241.10	9.89e-06
BTNL9	ENSG00000165810.16	1e-05
SLC29A3	ENSG00000198246.7	1.01e-05
KIF2C	ENSG00000142945.12	1.08e-05
MPV17	ENSG00000115204.14	1.1e-05
SCML2	ENSG00000102098.17	1.22e-05
TMEM251	ENSG00000153485.5	1.22e-05
MUTYH	ENSG00000132781.17	1.3e-05
EIF2B5	ENSG00000145191.11	1.34e-05
LRRC41	ENSG00000132128.16	1.41e-05
ATP1B3	ENSG00000069849.10	1.42e-05
UQCRH	ENSG00000173660.11	1.43e-05
RAB42	ENSG00000188060.6	1.43e-05
DTYMK	ENSG00000168393.12	1.44e-05
PIGU	ENSG00000101464.10	1.44e-05
FAM189B	ENSG00000160767.20	1.45e-05
ZNF576	ENSG00000124444.15	1.51e-05
RRP12	ENSG00000052749.13	1.54e-05
TAF3	ENSG00000165632.7	1.63e-05
GARS	ENSG00000106105.13	1.69e-05
XPO5	ENSG00000124571.17	1.69e-05
ERGIC3	ENSG00000125991.18	1.72e-05
CLTA	ENSG00000122705.16	1.77e-05
SLC16A3	ENSG00000141526.14	1.8e-05
KIFC1	ENSG00000237649.7	1.98e-05
EIF5B	ENSG00000158417.10	2.15e-05
CMB9-22P13.1	ENSG00000173727.11	2.21e-05
TRPC4AP	ENSG00000100991.11	2.24e-05
GAPDH	ENSG00000111640.14	2.27e-05
CCT3	ENSG00000163468.14	2.32e-05
BRK1	ENSG00000254999.3	2.32e-05
CDC42EP2	ENSG00000149798.4	2.34e-05
TMEM106C	ENSG00000134291.11	2.57e-05
POLR2L	ENSG00000177700.5	2.64e-05
UBE2S	ENSG00000108106.13	2.78e-05
COMMD3	ENSG00000148444.15	2.79e-05
PPP1R14B	ENSG00000173457.10	2.92e-05
MRPL11	ENSG00000174547.13	2.94e-05
SLC11A1	ENSG00000018280.16	3e-05
CHEK1	ENSG00000149554.12	3.03e-05
SRD5A3	ENSG00000128039.10	3.11e-05
UCK2	ENSG00000143179.12	3.17e-05
MKLN1-AS	ENSG00000236753.5	3.35e-05
RP5-864K19.4	ENSG00000228436.2	3.43e-05
KRBA1	ENSG00000133619.17	3.45e-05
TMEM147	ENSG00000105677.11	3.55e-05
CTC-297N7.9	ENSG00000264016.2	3.57e-05
HCFC1	ENSG00000172534.13	3.63e-05
ILKAP	ENSG00000132323.8	3.64e-05
AGTRAP	ENSG00000177674.15	3.64e-05
MAPKAPK5-AS1	ENSG00000234608.7	3.7e-05
NKX3-2	ENSG00000109705.7	3.75e-05
UPF3B	ENSG00000125351.10	3.77e-05
RRP8	ENSG00000132275.10	4.16e-05
ABCC5	ENSG00000114770.16	4.22e-05
C4orf47	ENSG00000205129.8	4.23e-05
CDKN2C	ENSG00000123080.10	4.26e-05
CCT4	ENSG00000115484.14	4.37e-05
NUP37	ENSG00000075188.8	4.42e-05
RAB24	ENSG00000169228.13	4.45e-05
MED10	ENSG00000133398.3	4.56e-05
MIR210HG	ENSG00000247095.2	4.58e-05
SLC1A5	ENSG00000105281.12	4.67e-05
SMS	ENSG00000102172.15	4.7e-05
AP001469.9	ENSG00000239415.1	4.7e-05
CCDC167	ENSG00000198937.8	4.78e-05
ACOT8	ENSG00000101473.16	4.79e-05
TM2D1	ENSG00000162604.12	4.81e-05
SNRPGP2	ENSG00000264350.1	4.82e-05
HEXB	ENSG00000049860.13	4.83e-05
ERI3	ENSG00000117419.14	5.04e-05
PPIL1	ENSG00000137168.7	5.13e-05
EZH2	ENSG00000106462.10	5.25e-05
RP11-810P12.7	ENSG00000279491.1	5.3e-05
ABCF3	ENSG00000161204.11	5.55e-05
ACOT7	ENSG00000097021.19	5.56e-05
RNF8	ENSG00000112130.16	5.58e-05
ARHGEF39	ENSG00000137135.17	5.61e-05
NUP205	ENSG00000155561.14	5.76e-05
YBX1	ENSG00000065978.17	5.78e-05
NAP1L4	ENSG00000205531.12	5.86e-05
KPNA2	ENSG00000182481.8	5.88e-05
FABP5P7	ENSG00000234964.4	5.88e-05
2019-03-02	ENSG00000117791.15	5.92e-05
GTF3C2	ENSG00000115207.13	5.97e-05
YIF1B	ENSG00000167645.16	6.16e-05
MTMR2	ENSG00000087053.18	6.23e-05
PTDSS2	ENSG00000174915.11	6.28e-05
G6PD	ENSG00000160211.15	6.64e-05
FAM127B	ENSG00000203950.6	6.75e-05
BIRC5	ENSG00000089685.14	6.93e-05
SLC9A3R1	ENSG00000109062.9	7.29e-05
CDC25C	ENSG00000158402.18	7.39e-05
STK39	ENSG00000198648.10	7.4e-05
PRR13	ENSG00000205352.10	7.42e-05
ZNF691	ENSG00000164011.17	7.49e-05
MRTO4	ENSG00000053372.4	7.49e-05
VOPP1	ENSG00000154978.12	7.64e-05
CDCA2	ENSG00000184661.13	7.69e-05
E2F2	ENSG00000007968.6	7.71e-05
CMSS1	ENSG00000184220.10	7.76e-05
DYNC1LI1	ENSG00000144635.8	7.94e-05
SPC25	ENSG00000152253.8	7.99e-05
FKBP4	ENSG00000004478.7	8.02e-05
RANBP1	ENSG00000099901.16	8.06e-05
LCAT	ENSG00000213398.7	8.15e-05
DYNLL1	ENSG00000088986.10	8.16e-05
CEBPZOS	ENSG00000218739.9	8.33e-05
UBE2E1	ENSG00000170142.11	8.42e-05
RP11-421M1.8	ENSG00000272097.1	8.45e-05
RP11-669E14.4	ENSG00000262881.1	8.48e-05
SF3B4	ENSG00000143368.9	8.48e-05
THAP2	ENSG00000173451.6	8.54e-05
FTH1P11	ENSG00000237264.4	8.59e-05
ADAMTS5	ENSG00000154736.5	8.63e-05
ATP5G1P4	ENSG00000227440.1	8.64e-05
TUBA1C	ENSG00000167553.14	8.81e-05
C3orf35	ENSG00000198590.11	8.86e-05
BCL10	ENSG00000142867.12	8.93e-05
PRAF2	ENSG00000243279.3	8.94e-05
ZNF37BP	ENSG00000234420.7	9.11e-05
TMCO3	ENSG00000150403.17	9.15e-05
RP11-620J15.3	ENSG00000257698.1	9.67e-05
LL22NC03-80A10.6	ENSG00000272779.1	9.74e-05
TP53RK	ENSG00000172315.5	9.75e-05
RP9P	ENSG00000205763.13	9.77e-05
POLR3C	ENSG00000186141.8	9.81e-05
SMG5	ENSG00000198952.8	9.98e-05
RDM1	ENSG00000278023.4	9.98e-05
GP6	ENSG00000088053.11	9.99e-05
MSANTD3	ENSG00000066697.14	0.0001
TXNL4A	ENSG00000141759.14	0.000101
RP11-258F1.2	ENSG00000279428.1	0.000101
SPP1	ENSG00000118785.13	0.000102
DHX34	ENSG00000134815.18	0.000103
SNRPD1	ENSG00000167088.10	0.000103
BRD8	ENSG00000112983.17	0.000103
C20orf27	ENSG00000101220.17	0.000103
CCL14	ENSG00000276409.4	0.000104
NAT9	ENSG00000109065.11	0.000104
DDX56	ENSG00000136271.10	0.000106
MAMSTR	ENSG00000176909.11	0.000108
MED8	ENSG00000159479.16	0.000109
ADH4	ENSG00000198099.8	0.000111
NUP85	ENSG00000125450.10	0.000114
CCDC34	ENSG00000109881.16	0.000118
GNG5	ENSG00000174021.10	0.000118
CFHR4	ENSG00000134365.12	0.000121
NOP58	ENSG00000055044.10	0.000122
ITGB1BP1	ENSG00000119185.12	0.000124
ARMC10	ENSG00000170632.13	0.000127
METTL18	ENSG00000171806.11	0.000128
TMEM115	ENSG00000126062.3	0.00013
ADAM12	ENSG00000148848.14	0.00013
NEIL3	ENSG00000109674.3	0.000132
SLC16A11	ENSG00000174326.11	0.000133
LINC00152	ENSG00000222041.10	0.000137
RP4-734G22.3	ENSG00000272078.1	0.000138
PARD3	ENSG00000148498.15	0.000141
ZFPL1	ENSG00000162300.11	0.000141
ACYP1	ENSG00000119640.8	0.000141
ZNF133	ENSG00000125846.15	0.000143
HAUS6	ENSG00000147874.10	0.000144
MYPOP	ENSG00000176182.5	0.000144
SLC52A2	ENSG00000185803.8	0.000145
N4BP3	ENSG00000145911.5	0.000146
ARF4	ENSG00000168374.10	0.000146
BAMBI	ENSG00000095739.10	0.00015
NUP155	ENSG00000113569.15	0.00015
TMEM237	ENSG00000155755.18	0.000152
AC083899.3	ENSG00000204745.3	0.000152
FAM50A	ENSG00000071859.14	0.000153
POLR2G	ENSG00000168002.11	0.000154
CCT7	ENSG00000135624.15	0.000157
PCAT6	ENSG00000228288.6	0.000158
SEC61A1	ENSG00000058262.9	0.000161
RP11-641D5.1	ENSG00000213178.3	0.000162
CCNB1	ENSG00000134057.14	0.000165
FTSJ1	ENSG00000068438.14	0.000166
RP11-165F24.2	ENSG00000235330.2	0.000166
DUSP12	ENSG00000081721.11	0.000166
CDK1	ENSG00000170312.15	0.000167
ATP6V0D2	ENSG00000147614.3	0.000168
TTYH3	ENSG00000136295.14	0.000169
HDAC2	ENSG00000196591.11	0.00017
MYL6B	ENSG00000196465.10	0.00017
ILF2	ENSG00000143621.16	0.000171
LSM5	ENSG00000106355.9	0.000171
HEATR5A	ENSG00000129493.14	0.000172
RNF145	ENSG00000145860.11	0.000173
C16orf59	ENSG00000162062.14	0.000174
EWSR1	ENSG00000182944.17	0.000175
CHORDC1	ENSG00000110172.11	0.000176
LL22NC03-N14H11.1	ENSG00000272872.1	0.000178
SGOL1	ENSG00000129810.14	0.000179
SRSF9	ENSG00000111786.8	0.000182
AC009005.2	ENSG00000267751.5	0.000187
CD58	ENSG00000116815.15	0.000187
C20orf24	ENSG00000101084.16	0.000189
TRIP13	ENSG00000071539.13	0.00019
DHDH	ENSG00000104808.7	0.000191
FAM24B	ENSG00000213185.6	0.000192
SH3GLB1	ENSG00000097033.14	0.000192
ISY1	ENSG00000240682.9	0.000195
SNHG3	ENSG00000242125.3	0.000195
NUF2	ENSG00000143228.12	0.000195
MMP10	ENSG00000166670.9	0.000197
ANAPC1	ENSG00000153107.11	0.000203
DDX11	ENSG00000013573.16	0.000203
VPS45	ENSG00000136631.12	0.000205
ACKR1	ENSG00000213088.9	0.000205
RAMP3	ENSG00000122679.8	0.000206
PGBD1	ENSG00000137338.5	0.000206
SNRPE	ENSG00000182004.12	0.000209
UPB1	ENSG00000100024.14	0.000209
CDCA5	ENSG00000146670.9	0.00021
CBX1	ENSG00000108468.14	0.000212
MAPKAPK5	ENSG00000089022.13	0.000216
MCM8	ENSG00000125885.13	0.000217
LLPH	ENSG00000139233.6	0.000218
REXO4	ENSG00000148300.11	0.000219
ADRA2B	ENSG00000274286.1	0.000219
ZNF239	ENSG00000196793.13	0.00022
CFHR3	ENSG00000116785.13	0.000221
LINC01554	ENSG00000236882.7	0.000223
E2F8	ENSG00000129173.12	0.000224
UBE2D2	ENSG00000131508.15	0.000225
NDC1	ENSG00000058804.11	0.000225
RAD54L	ENSG00000085999.11	0.000227
CBX2	ENSG00000173894.10	0.000229
CLIC1	ENSG00000213719.8	0.00023
E2F5	ENSG00000133740.10	0.00023
INPP5F	ENSG00000198825.11	0.000232
MMP1	ENSG00000196611.4	0.000232
PPHLN1	ENSG00000134283.17	0.000232
AURKA	ENSG00000087586.17	0.000233
NCBP2	ENSG00000114503.10	0.000235
WDR4	ENSG00000160193.11	0.000236
SGOL2	ENSG00000163535.17	0.000236
PRMT3	ENSG00000185238.12	0.000236
WDR77	ENSG00000116455.13	0.000237
RP11-1000B6.7	ENSG00000276724.1	0.000237
BACE1-AS	ENSG00000278768.1	0.000238
RP11-307C12.11	ENSG00000232093.1	0.00024
CENPI	ENSG00000102384.13	0.000245
RAN	ENSG00000132341.11	0.000246
AGPS	ENSG00000018510.12	0.000246
XCR1	ENSG00000173578.7	0.000246
SSR3	ENSG00000114850.6	0.000246
ZNF516	ENSG00000101493.10	0.000246
RP11-3P17.5	ENSG00000269888.1	0.000247
TOP2B	ENSG00000077097.13	0.000247
GPATCH4	ENSG00000160818.16	0.000251
KTI12	ENSG00000198841.3	0.000256
METTL5	ENSG00000138382.13	0.000257
TICRR	ENSG00000140534.13	0.000257
TMEM234	ENSG00000160055.19	0.00026
VPS72	ENSG00000163159.11	0.00026
APOPT1	ENSG00000256053.7	0.000261
LRRC42	ENSG00000116212.14	0.000263
OLA1P1	ENSG00000213790.2	0.000264
THAP3	ENSG00000041988.15	0.000266
VN1R108P	ENSG00000230772.1	0.000268
SLC30A6	ENSG00000152683.14	0.000269
DYNC1H1	ENSG00000197102.10	0.000271
CSTF2	ENSG00000101811.13	0.000273
CDCA8	ENSG00000134690.10	0.000274
IER3	ENSG00000137331.11	0.000276
ARMC7	ENSG00000125449.6	0.000277
UBLCP1	ENSG00000164332.7	0.000277
GEMIN2	ENSG00000092208.16	0.000277
ATIC	ENSG00000138363.14	0.000278
TPRXL	ENSG00000180438.14	0.000279
TARS	ENSG00000113407.13	0.00028
NEK2	ENSG00000117650.12	0.000281
PRR19	ENSG00000188368.9	0.000281
GRIN2D	ENSG00000105464.3	0.000284
RP11-79P5.10	ENSG00000255883.1	0.000284
RP11-286H14.4	ENSG00000230626.3	0.000284
ERP29	ENSG00000089248.6	0.000285
SRL	ENSG00000185739.13	0.000286
CTB-193M12.5	ENSG00000280206.1	0.000287
PSMD13	ENSG00000185627.17	0.000288
NEU1	ENSG00000204386.10	0.000288
COPRS	ENSG00000172301.10	0.00029
MKLN1	ENSG00000128585.17	0.000292
RP11-817I4.2	ENSG00000276115.1	0.000292
NABP2	ENSG00000139579.12	0.000292
SRSF2	ENSG00000161547.14	0.000293
CTC-459F4.9	ENSG00000281468.1	0.000294
C20orf196	ENSG00000171984.14	0.000295
CTD-3138B18.5	ENSG00000268516.2	0.000295
CPS1	ENSG00000021826.14	0.000297
MCM3	ENSG00000112118.17	0.0003
MBOAT7	ENSG00000125505.16	0.000303
PPP2R1A	ENSG00000105568.17	0.000303
RP11-159J3.1	ENSG00000250982.2	0.000306
RTN3	ENSG00000133318.13	0.000307
MCM7	ENSG00000166508.17	0.000308
SUPT3H	ENSG00000196284.13	0.000309
UQCC3	ENSG00000204922.4	0.00031
AC097662.2	ENSG00000236432.7	0.000312
MMD	ENSG00000108960.7	0.000314
RP11-466H18.1	ENSG00000244398.1	0.000315
UBXN2A	ENSG00000173960.12	0.000316
CAD	ENSG00000084774.13	0.000318
EXO1	ENSG00000174371.16	0.000319
SFPQ	ENSG00000116560.10	0.000319
AMD1	ENSG00000123505.14	0.00032
ARHGAP39	ENSG00000147799.11	0.00032
FANCL	ENSG00000115392.11	0.00032
AUNIP	ENSG00000127423.10	0.000322
PHC2	ENSG00000134686.16	0.000323
HSF2	ENSG00000025156.12	0.000323
CDC45	ENSG00000093009.9	0.000324
HMGA1	ENSG00000137309.19	0.000324
CEP55	ENSG00000138180.15	0.000325
SLC22A1	ENSG00000175003.12	0.000325
RP11-783K16.5	ENSG00000256940.1	0.000326
ZNF408	ENSG00000175213.2	0.000327
CRNKL1	ENSG00000101343.14	0.000328
RP11-468E2.6	ENSG00000259371.2	0.000329
MITD1	ENSG00000158411.10	0.00033
ESCO2	ENSG00000171320.14	0.00033
BBS7	ENSG00000138686.9	0.000332
CCDC134	ENSG00000100147.13	0.000334
TAF11	ENSG00000064995.16	0.000334
SMOX	ENSG00000088826.17	0.000341
C11orf84	ENSG00000168005.8	0.000343
MRPS15	ENSG00000116898.11	0.000346
SNRPA	ENSG00000077312.8	0.000348
CENPQ	ENSG00000031691.6	0.000349
RBM14	ENSG00000239306.4	0.000351
ITM2A	ENSG00000078596.10	0.000353
CNTN6	ENSG00000134115.12	0.000354
MARCKSL1	ENSG00000175130.6	0.000354
VPS37C	ENSG00000167987.10	0.000358
CTD-2083E4.4	ENSG00000260774.1	0.000358
RP4-798A17.5	ENSG00000225704.2	0.000359
CDT1	ENSG00000167513.8	0.00036
RGS20	ENSG00000147509.13	0.000363
PET117	ENSG00000232838.3	0.000364
CHCHD2	ENSG00000106153.12	0.000364
UBAP2L	ENSG00000143569.18	0.000364
TBX19	ENSG00000143178.12	0.000368
ERCC1	ENSG00000012061.15	0.000368
RP11-337N6.3	ENSG00000280374.1	0.00037
PIFO	ENSG00000173947.13	0.00037
RP11-403I13.8	ENSG00000272419.5	0.000372
METTL1	ENSG00000037897.16	0.000376
KDELR1	ENSG00000105438.8	0.000377
ZBTB40	ENSG00000184677.16	0.000379
ANKRD24	ENSG00000089847.12	0.00038
SEC14L2	ENSG00000100003.17	0.000386
RBFA	ENSG00000101546.12	0.000386
RPLP2	ENSG00000177600.8	0.000387
CYB5D2	ENSG00000167740.9	0.000389
PRC1	ENSG00000198901.13	0.000391
RNF24	ENSG00000101236.16	0.000397
PRDX1	ENSG00000117450.13	0.000397
IFT20	ENSG00000109083.13	0.000401
RP11-252E2.2	ENSG00000261058.1	0.000403
DLGAP5	ENSG00000126787.12	0.000414
TMED7-TICAM2	ENSG00000251201.8	0.000415
B4GALT2	ENSG00000117411.16	0.000417
HN1	ENSG00000189159.15	0.000417
SF3A3	ENSG00000183431.11	0.00042
SUPT5H	ENSG00000196235.13	0.000422
MYLK2	ENSG00000101306.10	0.000422
RP11-177B4.1	ENSG00000248375.1	0.000423
PAIP1	ENSG00000172239.13	0.000426
VPS26A	ENSG00000122958.14	0.000427
CAPG	ENSG00000042493.15	0.000428
CBX3	ENSG00000122565.18	0.00043
TBL1XR1	ENSG00000177565.15	0.00043
ETV5	ENSG00000244405.7	0.000432
IMPDH1	ENSG00000106348.16	0.000433
PLOD2	ENSG00000152952.11	0.000433
POLD1	ENSG00000062822.12	0.000435
CENPM	ENSG00000100162.14	0.000435
APIP	ENSG00000149089.12	0.000436
CTD-2240J17.1	ENSG00000259372.2	0.000436
ZNF248	ENSG00000198105.11	0.000437
ZC2HC1A	ENSG00000104427.11	0.000437
SLC39A10	ENSG00000196950.13	0.000439
RP11-884K10.7	ENSG00000271976.1	0.000443
FFAR3	ENSG00000185897.6	0.000443
MKI67	ENSG00000148773.12	0.000445
LARS	ENSG00000133706.17	0.000446
EIF4A3	ENSG00000141543.9	0.000448
DLGAP4	ENSG00000080845.17	0.000448
RP11-295M18.6	ENSG00000272823.1	0.000448
PSMD1	ENSG00000173692.12	0.000449
PRPF39	ENSG00000185246.17	0.000453
MAPT	ENSG00000186868.15	0.000455
MRGBP	ENSG00000101189.6	0.000456
RPIA	ENSG00000153574.8	0.000457
SKA3	ENSG00000165480.15	0.000458
FAIM	ENSG00000158234.12	0.000459
LMAN2L	ENSG00000114988.11	0.000461
FBXO5	ENSG00000112029.9	0.000462
NME6	ENSG00000172113.8	0.000465
AP000695.4	ENSG00000233818.1	0.000465
FAM27E3	ENSG00000274026.1	0.000467
B4GALT5	ENSG00000158470.5	0.000468
USP39	ENSG00000168883.19	0.000469
COA4	ENSG00000181924.6	0.00047
EHMT2	ENSG00000204371.11	0.000472
TUBG1	ENSG00000131462.7	0.000474
DENND5A	ENSG00000184014.7	0.000475
RARS	ENSG00000113643.8	0.000475
CENPBD1P1	ENSG00000213753.10	0.000477
NCDN	ENSG00000020129.15	0.000478
MCM10	ENSG00000065328.16	0.000478
OIP5	ENSG00000104147.8	0.000478
AC116035.1	ENSG00000227260.1	0.000479
ZNF789	ENSG00000198556.13	0.000479
NUTM2B-AS1	ENSG00000225484.6	0.000482
WDHD1	ENSG00000198554.11	0.000482
SNX7	ENSG00000162627.16	0.000486
DANCR	ENSG00000226950.6	0.000486
HOXD9	ENSG00000128709.11	0.000486
XRCC3	ENSG00000126215.13	0.000488
MRPL36	ENSG00000171421.12	0.000491
TOMM34	ENSG00000025772.7	0.000493
CEBPZ	ENSG00000115816.13	0.000494
TTLL1	ENSG00000100271.16	0.000498
DDOST	ENSG00000244038.9	0.000498
AP5Z1	ENSG00000242802.6	0.000504
TCF21	ENSG00000118526.6	0.000509
RAB35	ENSG00000111737.11	0.000509
GNAI3	ENSG00000065135.8	0.000513
MRPL35	ENSG00000132313.14	0.000514
H2AFZ	ENSG00000164032.11	0.000516
RNFT2	ENSG00000135119.14	0.000516
POLR3D	ENSG00000168495.12	0.000517
GYS2	ENSG00000111713.2	0.000518
C19orf48	ENSG00000167747.13	0.000525
TTLL4	ENSG00000135912.10	0.000526
APRT	ENSG00000198931.10	0.000527
C8B	ENSG00000021852.12	0.000527
DNAJB2	ENSG00000135924.15	0.000531
ELOVL1	ENSG00000066322.12	0.000532
ENO1	ENSG00000074800.13	0.000533
AC012065.1	ENSG00000279307.1	0.000533
TMEM79	ENSG00000163472.18	0.000534
PPIH	ENSG00000171960.10	0.000535
LINC01268	ENSG00000227502.2	0.000535
SNRPB2	ENSG00000125870.10	0.000535
LINC01296	ENSG00000244306.9	0.000541
ANXA10	ENSG00000109511.10	0.000543
FHL3	ENSG00000183386.9	0.000545
TARDBP	ENSG00000120948.15	0.000546
APLP2	ENSG00000084234.16	0.000548
PDSS1	ENSG00000148459.15	0.000549
CES3	ENSG00000172828.12	0.000552
FBXO30	ENSG00000118496.4	0.000559
RP11-98G7.1	ENSG00000236947.5	0.000563
TMEM14C	ENSG00000111843.13	0.000565
ERCC6L	ENSG00000186871.6	0.000565
CHMP3	ENSG00000115561.14	0.000566
ST6GALNAC4	ENSG00000136840.18	0.000567
BRD9	ENSG00000028310.17	0.000569
KIF11	ENSG00000138160.5	0.000572
RCL1	ENSG00000120158.11	0.000575
